# Supplementary material for: Integrated poly-d,l-lactide-co-glycolide/silver nanocomposite: synthesis, characterization and wound healing potential in Wistar Albino rats
Source: Royal Society of Chemistry journal article supplement (doi:10.1039/c5ra23212k), 2016-01-01
Supplement: c5ra23212k1.pdf [file c5ra23212k1.pdf]

## Supplementary Figures

**Fig. S1.**

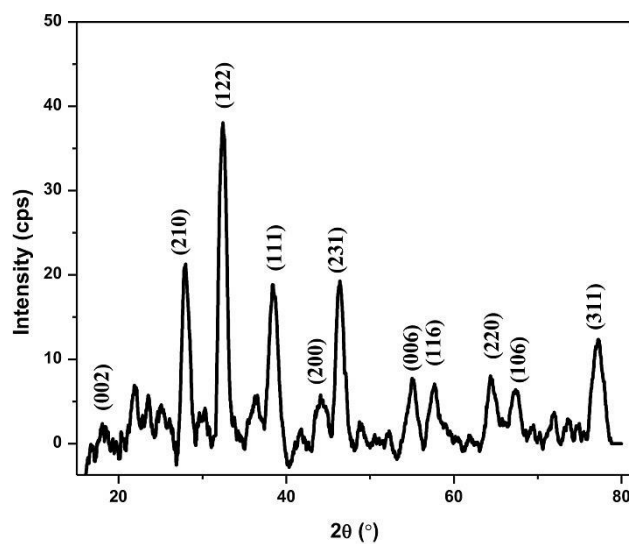

**Fig. S1.** XRD pattern of PLGA/Ag NC. The pattern of PLGA/Ag NC matches the face centered cubic (FCC) structure of bulk silver.
